# Supplementary material for: Twenty‐Year Trends in the American Heart Association Cardiovascular Health Score and Impact on Subclinical and Clinical Cardiovascular Disease: The Framingham Offspring Study
Source: PubMed Central journal article supplement — J Am Heart Assoc. 2018 May 17;7(11):e008741. doi: 10.1161/JAHA.118.008741 (PMC6015351; doi:10.1161/jaha.118.008741), 2018-05-17
Supplement: JAH3-7-e008741-s001.pdf [file JAH3-7-e008741-s001.pdf]

# **SUPPLEMENTAL MATERIAL**

**Table S1. Components and definition of the Cardiovascular Health score.**

| <b>Goal/Metric</b>       | <b>Poor Health</b>                        | <b>Intermediate Health</b>                              | <b>Ideal Health</b>                                            |
|--------------------------|-------------------------------------------|---------------------------------------------------------|----------------------------------------------------------------|
| Smoking                  | Current smoker                            | Quit $\leq$ 12 months                                   | Never or quit $\geq$ 12 months                                 |
| Body mass index          | $\geq 30$ kg/m <sup>2</sup>               | 25–<30 kg/m <sup>2</sup>                                | <25 kg/m <sup>2</sup>                                          |
| Physical activity score* | < Median value                            | Median value – top quartile                             | Top quartile                                                   |
| Healthy diet score†      | 0 components                              | 1 component                                             | $\geq$ 2 components                                            |
| Total cholesterol        | $\geq 240$ mg/dL                          | 200–<240 mg/dL or treated to goal                       | <200 mg/dL                                                     |
| Blood pressure           | SBP $\geq$ 140 mmHg or DBP $\geq$ 90 mmHg | SBP 120–<140 mmHg or DBP 80–<90 mmHg or treated to goal | SBP<120 mmHg and DBP<80 mmHg and not on hypertension treatment |
| Fasting plasma glucose   | $\geq 126$ mg/dL                          | 100–<126 mg/dL or treated to goal                       | <100 mg/dL and not on diabetes treatment                       |

SBP, systolic blood pressure; DBP, diastolic blood pressure

\*Physical activity score was calculated using the formula:

1\*sleep hrs/day + 1.1\*sedentary hrs/day + 1.5\*slight activity hrs/day + 2.4\*moderate activity hrs/day + 5\*heavy activity hrs/day

This definition is quantitatively similar to the AHA physical activity metric.

† Dietary components of the AHA healthy diet score:

$\geq 4.5$  cups/day of fruits and vegetables

$\geq$  two 3.5 oz servings/week of fish (preferably oily fish)

<1500 mg/day of sodium

$\leq 450$  kcal/week of sugar-sweetened beverages

$\geq$  three 1-oz equivalent servings/day of fiber-rich whole grains

**Table S2. Components and definition of subclinical disease.**

| Characteristic                                                      | Definition of subclinical disease component                                                                                                                                                                                                                                  | Cut-points for subclinical disease presence used in the present study                                                                                                                                                                                           |
|---------------------------------------------------------------------|------------------------------------------------------------------------------------------------------------------------------------------------------------------------------------------------------------------------------------------------------------------------------|-----------------------------------------------------------------------------------------------------------------------------------------------------------------------------------------------------------------------------------------------------------------|
| <b>1. Left ventricular (LV) hypertrophy by ECG/echocardiography</b> |                                                                                                                                                                                                                                                                              |                                                                                                                                                                                                                                                                 |
| LV hypertrophy by ECG                                               | Sum of R in AVL plus S in V3                                                                                                                                                                                                                                                 | Exceeding 2.8 mV in men and 2.0 mV in women                                                                                                                                                                                                                     |
| LV hypertrophy by echocardiography                                  | LV mass was calculated as $0.8 \{1.04 [(IVS+LVEDD+PW)^3 - (LVEDD)^3]\} + 0.6$ g. LV mass values were then adjusted for height using the ratio of LV mass to height.                                                                                                          | LVM/height (in meters) $\geq 127$ in men, and<br>LVM/height (in meters) $\geq 100$ in women                                                                                                                                                                     |
| <b>2. LV systolic dysfunction by echocardiography</b>               |                                                                                                                                                                                                                                                                              |                                                                                                                                                                                                                                                                 |
| LV systolic dysfunction                                             | LV fractional shortening was calculated as $(LVEDD-LVESD)/LVEDD$ .                                                                                                                                                                                                           | A fractional shortening of less than 0.29 by M-mode, or by evidence on two-dimensional echocardiography of mild or greater systolic dysfunction on visual assessment in multiple views (corresponding to ejection fraction less than 50%), or by both criteria. |
| <b>3. Carotid ultrasound abnormality*</b>                           |                                                                                                                                                                                                                                                                              |                                                                                                                                                                                                                                                                 |
| Increased carotid artery IMT                                        | A composite measure that combined the maximal common carotid artery IMT and maximal internal carotid artery IMT was obtained by averaging these two measurements after standardization (subtraction of the mean and division by the standard deviation for the measurement). | 1) A standardized carotid IMT that met or exceeded the sex-specific 80th percentiles in the sample;<br>2) An extreme increase of common carotid IMT; or<br>3) Presence of carotid artery stenosis $\geq 25\%$ .                                                 |
| Extreme increase of common carotid artery IMT                       | An extreme increase of common carotid IMT $\geq 1$ mm.                                                                                                                                                                                                                       |                                                                                                                                                                                                                                                                 |
| Carotid artery stenosis $\geq 25\%$                                 | Presence of a stenosis of $\geq 25\%$ in the internal or common carotid artery.                                                                                                                                                                                              |                                                                                                                                                                                                                                                                 |
| <b>4. Peripheral arterial disease</b>                               |                                                                                                                                                                                                                                                                              |                                                                                                                                                                                                                                                                 |
| Ankle-brachial index $\leq 0.9$                                     | Defined as the ratio of the average systolic blood pressure at the ankle of each leg divided by the average systolic blood pressure in the arm with the highest blood pressure.                                                                                              | An ankle-brachial index at or below 0.9 in either leg.                                                                                                                                                                                                          |
| <b>5. Glomerular endothelial dysfunction</b>                        |                                                                                                                                                                                                                                                                              |                                                                                                                                                                                                                                                                 |
| Microalbuminuria                                                    | Urine albumin to urine creatinine ratio                                                                                                                                                                                                                                      | $\geq 25$ $\mu\text{g}/\text{mg}$ in men, and $\geq 35$ $\mu\text{g}/\text{mg}$ in women                                                                                                                                                                        |

IMT: intima-media thickness; LVEDD: left ventricular end diastolic diameter; LVESD: left ventricular end systolic diameter; LVM: left ventricular mass; PW: posterior wall; IVS: inter-ventricular septum.

\*In Exam 5, carotid ultrasound abnormality was defined using only carotid artery stenosis  $\geq 25\%$ . In Exam 8, carotid ultrasound abnormality was defined using only increased carotid artery IMT or extreme increase of common carotid artery IMT.

**Table S3. Frequencies of CVH score groups by sex in sample with  $\geq 2$  exams available (n=2,805).**

| <b>CVH score category, n (%)</b> | <b>Women<br/>N=1549</b> | <b>Men<br/>N=1256</b> |
|----------------------------------|-------------------------|-----------------------|
| High – high                      | 840 (54.2)              | 532 (42.4)            |
| High – low                       | 276 (17.8)              | 275 (21.9)            |
| Low – high                       | 119 (7.7)               | 135 (10.7)            |
| Low – low                        | 314 (20.3)              | 314 (25.0)            |

High – high: starting CVH score  $\geq 8$  and last CVH score of  $\geq 8$

High – low: starting CVH score  $\geq 8$  and last CVH score of  $\leq 7$

Low – high: starting CVH score  $\leq 7$  and last CVH score of  $\geq 8$

Low – low: starting CVH score  $\leq 7$  and last CVH score of  $\leq 7$

CVH: cardiovascular health

**Table S4. Distribution of exams for participants with  $\geq 2$  exams available.**

| <b>Available exams</b>         | <b>N (%)</b> |
|--------------------------------|--------------|
| Exam 5, Exam 6, Exam 7, Exam 8 | 997 (35.5)   |
| Exam 5, Exam 6, Exam 7         | 336 (12.0)   |
| Exam 5, Exam 6, Exam 8         | 177 (6.3)    |
| Exam 5, Exam 7, Exam 8         | 400 (14.2)   |
| Exam 6, Exam 7, Exam 8         | 140 (5.0)    |
| Exam 5, Exam 6                 | 214 (7.6)    |
| Exam 5, Exam 7                 | 187 (6.7)    |
| Exam 5, Exam 8                 | 114 (4.1)    |
| Exam 6, Exam 7                 | 86 (3.1)     |
| Exam 6, Exam 8                 | 39 (1.4)     |
| Exam 7, Exam 8                 | 115 (4.1)    |

Abbreviations: Exam= FHS examination cycle; N=count

**Table S5. Breakdown of incident cardiovascular disease (CVD) events.**

| <b>CVD event type</b>                                                                 | <b>N (%)</b> |
|---------------------------------------------------------------------------------------|--------------|
| Myocardial infarction recognized, with diagnostic electrocardiogram                   | 37 (8.6)     |
| Myocardial infarction recognized, without electrocardiogram, with enzymes and history | 48 (11.2)    |
| Myocardial infarction unrecognized, silent                                            | 7 (1.6)      |
| Myocardial infarction unrecognized, not silent                                        | 2 (0.5)      |
| Angina pectoris, first episode only                                                   | 80 (18.7)    |
| Coronary insufficiency, definite by both history and ECG                              | 8 (1.9)      |
| Atherothrombotic infarction of brain                                                  | 43 (10.1)    |
| Transient ischemic stroke                                                             | 46 (10.8)    |
| Cerebral embolism                                                                     | 13 (3.0)     |
| Intracerebral hemorrhage                                                              | 9 (2.1)      |
| Subarachnoid hemorrhage                                                               | 3 (0.7)      |
| Other cerebrovascular accident                                                        | 1 (0.2)      |
| Death, coronary heart disease sudden, within 1 hour                                   | 11 (2.6)     |
| Death, coronary heart disease, 1-23 hours, non-sudden                                 | 2 (0.5)      |
| Death, coronary heart disease, 24-47 hours, non-sudden                                | 1 (0.2)      |
| Death, coronary heart disease, 48 hours+, non-sudden                                  | 2 (0.5)      |
| Death, cerebrovascular accident                                                       | 1 (0.2)      |
| Death, other cardiovascular disease                                                   | 4 (0.9)      |
| Intermittent claudication, first episode only                                         | 33 (7.7)     |
| Congestive heart failure, not hospitalized                                            | 9 (2.1)      |
| Congestive heart failure, hospitalized                                                | 68 (15.9)    |

Figure S1. Sample exclusions.

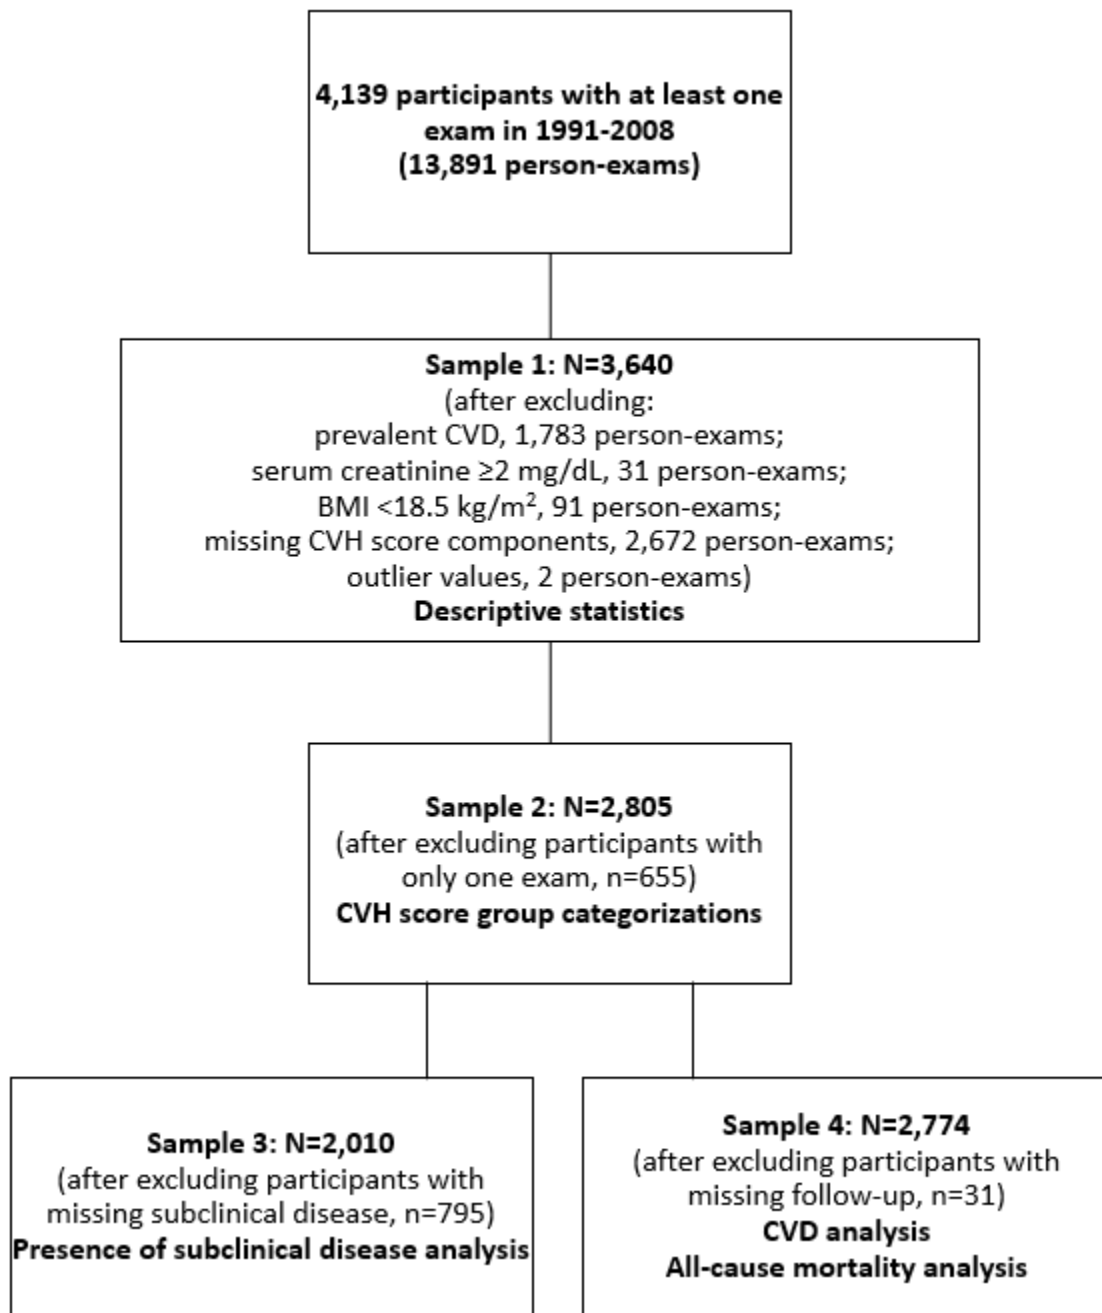

CVH: cardiovascular health; CVD: cardiovascular disease; BMI: body mass index
